# Supplementary material for: Integrative Morphological and Genetic Characterisation of the Fish Parasitic Copepod Ergasilus mirabilis Oldewage & van As, 1987: Insights into Host Specificity and Distribution in Southern Africa
Source: MDPI journal article supplement (doi:10.3390/d15090965), 2023-08-26
Supplement: s1 [file s1]

## Supplementary Materials

**Table S1.** Genetic divergences among aligned 18S rRNA sequences expressed as percentage identities (below diagonal) and differences in the number of nucleotides (above diagonal). Represented as GenBank/Sequence ID, Taxon and Country. Sequences from the present study in bold and grey shade. *Lernaea cyprinacea* (MH982195) was used as the outgroup. Abbreviations: AR—Argentina, BI—Burundi; CN—China, CZ—Czech Republic, HU—Hungary, KR—South Korea, NI—Nicaragua, ZA—South Africa (Vaal River), ZM—Zambia (Zambezi River).

|    |                                               | 1          | 2     | 3     | 4         | 5         | 6      | 7     | 8      | 9     | 10    | 11    | 12    | 13    | 14    | 15    | 16    | 17    | 18     | 19     | 20    | 21    | 22     | 23    | 24    | 25    | 26    | 27    | 28    | 29  | 30  |
|----|-----------------------------------------------|------------|-------|-------|-----------|-----------|--------|-------|--------|-------|-------|-------|-------|-------|-------|-------|-------|-------|--------|--------|-------|-------|--------|-------|-------|-------|-------|-------|-------|-----|-----|
| 1  | OR449753 <i>Ergasilus mirabilis</i> ZA        |            | 0     | 33    | 25        | 24        | 3      | 22    | 3      | 4     | 4     | 31    | 3     | 39    | 32    | 16    | 24    | 26    | 26     | 25     | 25    | 27    | 23     | 25    | 25    | 28    | 30    | 33    | 31    | 30  | 136 |
| 2  | OR449754 <i>Ergasilus mirabilis</i> ZM        | 100        |       | 37    | 29        | 28        | 3      | 26    | 3      | 4     | 4     | 35    | 3     | 43    | 36    | 19    | 28    | 29    | 27     | 25     | 27    | 27    | 25     | 30    | 26    | 33    | 35    | 37    | 35    | 34  | 139 |
| 3  | MN852694 <i>Acusicola margulisae</i> NI       | 97.5997.31 |       | 39    | 43        | 23        | 36     | 23    | 22     | 22    | 47    | 23    | 45    | 50    | 36    | 43    | 48    | 33    | 37     | 34     | 36    | 35    | 38     | 38    | 38    | 38    | 48    | 45    | 44    | 143 |     |
| 4  | DQ107564 <i>Ergasilus anchoratus</i> CN       | 98.1797.89 | 97.16 |       | 32        | 13        | 25     | 13    | 14     | 14    | 35    | 13    | 39    | 29    | 27    | 32    | 41    | 34    | 30     | 31     | 32    | 29    | 11     | 11    | 14    | 15    | 35    | 33    | 34    | 139 |     |
| 5  | DQ107572 <i>Ergasilus brianii</i> CN          | 98.2497.96 | 96.87 | 97.67 |           | 20        | 14     | 20    | 21     | 21    | 20    | 20    | 38    | 41    | 23    | 4     | 39    | 38    | 12     | 13     | 14    | 11    | 34     | 34    | 35    | 37    | 39    | 37    | 36    | 143 |     |
| 6  | OQ407469 <i>Ergasilus caparti</i> BI          | 99.7099.70 | 97.69 | 99.79 | 99.79     |           | 13     | 0     | 1      | 1     | 25    | 0     | 28    | 18    | 15    | 20    | 16    | 16    | 18     | 20     | 20    | 18    | 12     | 12    | 14    | 15    | 15    | 17    | 16    | 98  |     |
| 7  | DQ107573 <i>Ergasilus hypomesi</i> CN         | 98.3998.11 | 97.38 | 98.18 | 98.98     | 98.69     |        | 13    | 14     | 14    | 20    | 13    | 32    | 35    | 21    | 14    | 37    | 32    | 12     | 13     | 14    | 11    | 26     | 26    | 27    | 29    | 37    | 35    | 34    | 141 |     |
| 8  | OQ407465 <i>Ergasilus macrodactylus</i> BI    | 99.7099.70 | 97.69 | 99.79 | 99.79     | 99.100.00 | 98.69  |       | 1      | 1     | 25    | 0     | 28    | 18    | 15    | 20    | 16    | 16    | 18     | 20     | 20    | 18    | 12     | 12    | 14    | 15    | 15    | 17    | 16    | 98  |     |
| 9  | OQ407466 <i>Ergasilus megacheir</i> BI        | 99.6099.60 | 97.79 | 98.98 | 99.79     | 99.90     | 98.59  | 99.90 |        | 0     | 26    | 1     | 29    | 19    | 14    | 21    | 15    | 17    | 19     | 21     | 21    | 19    | 13     | 13    | 15    | 16    | 16    | 18    | 17    | 97  |     |
| 10 | OQ407467 <i>Ergasilus parasarsi</i> BI        | 99.6099.60 | 97.79 | 98.98 | 99.79     | 99.90     | 98.59  | 99.90 | 100.00 |       | 26    | 1     | 29    | 19    | 14    | 21    | 15    | 17    | 19     | 21     | 21    | 19    | 13     | 13    | 15    | 16    | 16    | 18    | 17    | 97  |     |
| 11 | DQ107567 <i>Ergasilus parasiluri</i> CN       | 97.7397.45 | 96.58 | 97.45 | 98.54     | 97.49     | 98.54  | 97.49 | 97.39  | 97.39 |       | 25    | 43    | 44    | 30    | 20    | 42    | 38    | 22     | 22     | 22    | 22    | 37     | 37    | 38    | 40    | 44    | 42    | 41    | 150 |     |
| 12 | OQ407468 <i>Ergasilus parvus</i> BI           | 99.7099.70 | 97.69 | 99.79 | 99.100.00 | 98.69     | 100.00 | 99.90 | 99.90  | 97.49 |       | 28    | 18    | 15    | 20    | 16    | 16    | 18    | 20     | 20     | 18    | 12    | 12     | 14    | 15    | 15    | 17    | 16    | 98    |     |     |
| 13 | DQ107577 <i>Ergasilus peregrinus</i> CN       | 97.1596.87 | 96.72 | 97.16 | 97.23     | 97.19     | 97.67  | 97.19 | 97.09  | 97.09 | 96.87 | 97.19 |       | 51    | 36    | 37    | 43    | 44    | 33     | 34     | 35    | 32    | 41     | 41    | 40    | 40    | 40    | 38    | 37    | 148 |     |
| 14 | DQ107565 <i>Ergasilus scalaris</i> CN         | 97.6697.38 | 96.36 | 97.89 | 97.01     | 98.19     | 97.45  | 98.19 | 98.09  | 98.09 | 96.80 | 98.19 | 96.28 |       | 34    | 41    | 48    | 43    | 39     | 41     | 41    | 39    | 30     | 30    | 31    | 32    | 45    | 43    | 42    | 145 |     |
| 15 | MW810238 <i>Ergasilus sieboldi</i> CZ         | 98.8398.62 | 97.38 | 98.03 | 98.32     | 98.49     | 98.47  | 98.49 | 98.59  | 98.59 | 97.82 | 98.49 | 97.38 | 97.52 |       | 23    | 24    | 30    | 21     | 22     | 23    | 20    | 26     | 25    | 27    | 30    | 35    | 31    | 30    | 136 |     |
| 16 | DQ107569 <i>Ergasilus tumidus</i> CN          | 98.2497.96 | 96.87 | 97.67 | 99.71     | 97.99     | 98.98  | 97.99 | 97.89  | 97.89 | 98.54 | 97.99 | 30.97 | 0.19  | 8.32  |       | 39    | 38    | 12     | 13     | 14    | 11    | 34     | 34    | 35    | 37    | 39    | 37    | 36    | 144 |     |
| 17 | DQ107578 <i>Ergasilus yaluzangbus</i> CN      | 98.1097.89 | 96.50 | 97.01 | 97.16     | 98.39     | 97.31  | 98.39 | 98.49  | 98.49 | 96.94 | 98.39 | 96.87 | 96.50 | 98.25 | 97.16 |       | 38    | 33     | 33     | 35    | 31    | 37     | 36    | 39    | 42    | 43    | 39    | 39    | 140 |     |
| 18 | *MT969345 <i>Ergasilus yandemontei</i> AR     | 98.1198.04 | 97.59 | 97.52 | 97.22     | 98.42     | 97.67  | 98.42 | 98.32  | 98.32 | 97.22 | 98.42 | 96.77 | 96.84 | 97.82 | 97.22 | 97.22 |       | 31     | 31     | 31    | 31    | 33     | 33    | 36    | 39    | 39    | 36    | 35    | 141 |     |
| 19 | MW810236 <i>Neoergasilus japonicus</i> CZ     | 98.1698.16 | 97.28 | 97.79 | 99.12     | 98.19     | 99.12  | 98.19 | 98.09  | 98.09 | 98.38 | 98.19 | 97.57 | 97.13 | 98.45 | 99.12 | 97.57 | 97.72 |        | 2      | 2     | 0     | 28     | 28    | 29    | 29    | 41    | 37    | 36    | 139 |     |
| 20 | MH167969 <i>Neoergasilus japonicus</i> CZ     | 98.1598.01 | 97.49 | 97.71 | 99.04     | 97.99     | 99.04  | 97.99 | 97.89  | 97.89 | 98.38 | 97.99 | 97.49 | 96.97 | 98.38 | 98.99 | 0.49  | 97.57 | 97.71  | 99.85  |       | 0     | 2      | 27    | 27    | 28    | 28    | 40    | 35    | 35  | 136 |
| 21 | MW810237 <i>Neoergasilus japonicus</i> CZ     | 98.0198.01 | 97.35 | 97.64 | 98.97     | 97.99     | 98.97  | 97.99 | 97.89  | 97.89 | 98.38 | 97.99 | 97.42 | 96.98 | 98.31 | 98.97 | 97.42 | 97.72 | 99.85  | 100.00 |       | 2     | 28     | 28    | 29    | 29    | 41    | 37    | 36    | 139 |     |
| 22 | MH167970 <i>Neoergasilus japonicus</i> CZ     | 98.3098.16 | 97.42 | 97.86 | 99.19     | 98.19     | 99.19  | 98.19 | 98.09  | 98.09 | 98.38 | 98.19 | 97.64 | 97.12 | 98.52 | 99.19 | 97.71 | 97.11 | 100.00 | 99.85  | 99.85 |       | 27     | 27    | 28    | 28    | 40    | 35    | 35    | 136 |     |
| 23 | DQ107560 <i>Sinergasilus major</i> CN         | 98.1797.82 | 97.23 | 99.20 | 97.52     | 98.80     | 98.11  | 98.80 | 98.69  | 98.69 | 97.31 | 98.80 | 97.01 | 97.82 | 98.11 | 97.52 | 97.31 | 97.59 | 97.94  | 98.01  | 97.94 | 98.01 |        | 0     | 3     | 7     | 38    | 37    | 36    | 138 |     |
| 24 | MZ047814 <i>Sinergasilus major</i> HU         | 98.1798.10 | 97.22 | 99.20 | 97.51     | 98.80     | 98.10  | 98.80 | 98.69  | 98.69 | 97.30 | 98.80 | 97.00 | 97.81 | 98.17 | 97.51 | 97.37 | 97.59 | 97.94  | 98.01  | 97.94 | 98.01 | 100.00 |       | 3     | 7     | 37    | 36    | 35    | 138 |     |
| 25 | DQ107563 <i>Sinergasilus polycolpus</i> CN    | 97.9597.60 | 97.23 | 98.98 | 97.45     | 98.59     | 98.03  | 98.59 | 98.49  | 98.49 | 97.23 | 98.59 | 97.09 | 97.74 | 98.03 | 97.45 | 97.16 | 97.37 | 97.87  | 97.94  | 97.87 | 97.94 | 99.78  | 99.78 |       | 6     | 40    | 39    | 38    | 137 |     |
| 26 | DQ107561 <i>Sinergasilus undulatus</i> CN     | 97.8197.45 | 97.23 | 98.91 | 97.31     | 98.49     | 97.89  | 98.49 | 98.39  | 98.39 | 97.09 | 98.49 | 97.09 | 97.67 | 97.82 | 97.31 | 96.94 | 97.14 | 97.87  | 97.94  | 97.87 | 97.94 | 99.49  | 99.49 | 99.56 |       | 43    | 42    | 41    | 141 |     |
| 27 | DQ107576 <i>Paraergasilus brevidigitus</i> CN | 97.5997.31 | 96.50 | 97.45 | 97.16     | 98.49     | 97.30  | 98.49 | 98.39  | 98.39 | 96.80 | 98.49 | 97.08 | 96.72 | 97.45 | 97.16 | 96.87 | 97.14 | 96.98  | 97.05  | 96.98 | 97.05 | 97.23  | 97.30 | 97.09 | 96.87 |       | 8     | 7     | 145 |     |
| 28 | MW810239 <i>Paraergasilus longidigitus</i> CZ | 97.7397.45 | 96.72 | 97.59 | 97.30     | 98.29     | 97.45  | 98.29 | 98.19  | 98.19 | 96.94 | 98.29 | 97.23 | 96.87 | 97.74 | 97.30 | 97.16 | 97.37 | 97.28  | 97.42  | 97.28 | 97.42 | 97.31  | 97.37 | 97.16 | 96.94 | 99.42 |       | 3     | 142 |     |
| 29 | DQ107574 <i>Paraergasilus medius</i> CN       | 97.8197.52 | 96.79 | 97.52 | 97.38     | 98.39     | 97.52  | 98.39 | 98.29  | 98.29 | 97.01 | 98.39 | 97.30 | 96.94 | 97.81 | 97.38 | 97.16 | 97.44 | 97.35  | 97.42  | 97.35 | 97.42 | 97.38  | 97.44 | 97.23 | 97.01 | 99.49 | 99.78 |       | 142 |     |
| 30 | MH982195 <i>Lernaea cyprinacea</i> CN         | 90.1789.98 | 89.69 | 98.89 | 98.69     | 90.40     | 89.83  | 90.40 | 90.50  | 90.50 | 89.19 | 90.40 | 89.33 | 89.55 | 90.19 | 89.62 | 89.91 | 89.63 | 89.95  | 90.15  | 89.95 | 90.15 | 90.05  | 90.03 | 90.12 | 89.83 | 89.55 | 89.76 | 89.76 |     |     |

**Table S2.** Genetic divergences among aligned 28S rRNA sequences expressed as percentage identities (below diagonal) and differences in the number of nucleotides (above diagonal). Represented as GenBank/Sequence ID, Taxon and Country. Sequences from the present study in bold and grey shade. *Lernaea cyprinacea* (MH982204) was used as the outgroup. Abbreviations: BI—Burundi; CN—China, CZ—Czech Republic, EG—Egypt, HU—Hungary, NI—Nicaragua, ZA—South Africa (Vaal River), ZM—Zambia (Zambezi River).

|    |                                               | 1      | 2     | 3     | 4     | 5     | 6     | 7     | 8     | 9     | 10    | 11    | 12    | 13    | 14    | 15    | 16    | 17    | 18    | 19    | 20     | 21    | 22    | 23    | 24    | 25    | 26    | 27    | 28    | 29    | 30  |
|----|-----------------------------------------------|--------|-------|-------|-------|-------|-------|-------|-------|-------|-------|-------|-------|-------|-------|-------|-------|-------|-------|-------|--------|-------|-------|-------|-------|-------|-------|-------|-------|-------|-----|
| 1  | <b>OR449755 <i>Ergasilus mirabilis</i> ZA</b> |        | 0     | 71    | 85    | 66    | 32    | 65    | 43    | 41    | 44    | 72    | 45    | 78    | 62    | 57    | 67    | 61    | 81    | 76    | 73     | 74    | 74    | 68    | 70    | 69    | 97    | 79    | 84    | 84    | 218 |
| 2  | <b>OR449756 <i>Ergasilus mirabilis</i> ZM</b> | 100.00 |       | 71    | 85    | 67    | 32    | 66    | 43    | 41    | 44    | 73    | 45    | 78    | 62    | 57    | 68    | 61    | 82    | 76    | 73     | 74    | 74    | 69    | 70    | 70    | 98    | 79    | 85    | 85    | 218 |
| 3  | MN852851 <i>Acusicola margulisae</i> NI       | 88.87  | 88.91 |       | 71    | 50    | 66    | 43    | 70    | 70    | 73    | 49    | 72    | 51    | 54    | 50    | 53    | 49    | 79    | 64    | 62     | 62    | 63    | 45    | 49    | 49    | 82    | 67    | 71    | 71    | 202 |
| 4  | DQ107528 <i>Ergasilus anchoratus</i> CN       | 87.29  | 87.72 | 88.89 |       | 74    | 77    | 63    | 80    | 80    | 85    | 78    | 84    | 76    | 73    | 69    | 78    | 64    | 100   | 81    | 80     | 80    | 81    | 72    | 72    | 71    | 25    | 9     | 12    | 11    | 228 |
| 5  | DQ107532 <i>Ergasilus brianii</i> CN          | 90.15  | 90.33 | 92.18 | 89.31 |       | 67    | 32    | 66    | 69    | 71    | 18    | 70    | 23    | 43    | 37    | 19    | 43    | 77    | 46    | 45     | 45    | 46    | 47    | 51    | 55    | 87    | 71    | 74    | 75    | 213 |
| 6  | OQ407474 <i>Ergasilus caparti</i> BI          | 95.10  | 95.10 | 89.56 | 88.23 | 89.77 |       | 59    | 13    | 14    | 18    | 72    | 17    | 73    | 65    | 59    | 69    | 57    | 73    | 72    | 70     | 70    | 71    | 66    | 66    | 69    | 91    | 73    | 78    | 76    | 210 |
| 7  | DQ107539 <i>Ergasilus hypomesi</i> CN         | 90.30  | 90.48 | 93.27 | 90.90 | 95.38 | 90.99 |       | 63    | 66    | 64    | 32    | 67    | 35    | 40    | 35    | 35    | 41    | 68    | 43    | 41     | 41    | 42    | 47    | 45    | 49    | 75    | 55    | 62    | 62    | 215 |
| 8  | OQ407470 <i>Ergasilus macrodactylus</i> BI    | 93.42  | 93.42 | 88.92 | 87.77 | 89.92 | 98.01 | 90.38 |       | 9     | 15    | 72    | 6     | 73    | 70    | 62    | 68    | 57    | 71    | 74    | 73     | 74    | 67    | 68    | 68    | 72    | 90    | 76    | 79    | 79    | 205 |
| 9  | OQ407471 <i>Ergasilus megacheir</i> BI        | 93.72  | 93.72 | 88.92 | 87.77 | 89.47 | 97.86 | 89.92 | 98.62 |       | 19    | 75    | 13    | 76    | 72    | 64    | 72    | 60    | 73    | 77    | 76     | 76    | 77    | 68    | 69    | 72    | 90    | 76    | 79    | 78    | 206 |
| 10 | OQ407473 <i>Ergasilus parasarsi</i> BI        | 93.26  | 93.26 | 88.45 | 87.00 | 89.16 | 97.24 | 90.23 | 97.70 | 97.09 |       | 71    | 15    | 74    | 72    | 67    | 74    | 65    | 70    | 70    | 69     | 69    | 70    | 74    | 76    | 77    | 95    | 81    | 84    | 82    | 206 |
| 11 | DQ107536 <i>Ergasilus parasiluri</i> CN       | 89.24  | 89.45 | 92.32 | 88.71 | 97.40 | 88.99 | 95.37 | 88.99 | 88.53 | 89.14 |       | 72    | 9     | 72    | 40    | 25    | 45    | 74    | 40    | 38     | 38    | 39    | 56    | 58    | 60    | 91    | 75    | 78    | 79    | 206 |
| 12 | OQ407472 <i>Ergasilus parvus</i> BI           | 93.11  | 93.11 | 88.61 | 87.16 | 89.31 | 97.40 | 89.77 | 99.08 | 98.01 | 97.70 | 88.99 |       | 75    | 72    | 66    | 72    | 60    | 74    | 76    | 75     | 75    | 76    | 72    | 73    | 77    | 94    | 80    | 83    | 83    | 204 |
| 13 | DQ107538 <i>Ergasilus scalaris</i> CN         | 88.34  | 88.73 | 92.01 | 89.00 | 96.67 | 88.84 | 94.93 | 88.84 | 88.38 | 88.69 | 98.70 | 88.53 |       | 72    | 40    | 30    | 46    | 73    | 40    | 36     | 38    | 37    | 55    | 56    | 59    | 91    | 74    | 78    | 79    | 205 |
| 14 | MW810242 <i>Ergasilus sieboldi</i> CZ         | 90.37  | 90.37 | 91.25 | 88.68 | 93.33 | 89.83 | 93.80 | 89.05 | 88.73 | 88.26 | 92.86 | 88.42 | 92.86 |       | 10    | 44    | 46    | 66    | 53    | 51     | 51    | 52    | 49    | 49    | 50    | 90    | 71    | 76    | 79    | 215 |
| 15 | OM812074 <i>Ergasilus sieboldi</i> EG         | 91.01  | 91.01 | 91.76 | 89.13 | 94.17 | 90.62 | 94.49 | 90.14 | 89.83 | 89.35 | 93.69 | 89.51 | 93.69 | 98.42 |       | 36    | 44    | 62    | 46    | 44     | 44    | 45    | 44    | 44    | 48    | 83    | 66    | 69    | 71    | 210 |
| 16 | DQ107535 <i>Ergasilus tumidus</i> CN          | 90.00  | 90.19 | 91.71 | 88.73 | 97.25 | 89.47 | 94.94 | 89.62 | 89.01 | 88.70 | 96.38 | 89.01 | 95.66 | 93.18 | 94.33 |       | 46    | 74    | 43    | 41     | 41    | 42    | 52    | 52    | 58    | 91    | 75    | 78    | 77    | 213 |
| 17 | DQ107531 <i>Ergasilus peregrinus</i> CN       | 90.88  | 91.18 | 92.32 | 90.74 | 93.78 | 91.28 | 94.07 | 91.28 | 90.83 | 90.06 | 93.48 | 90.83 | 93.33 | 92.86 | 93.06 | 93.34 |       | 66    | 59    | 58     | 58    | 59    | 43    | 46    | 42    | 80    | 59    | 66    | 69    | 207 |
| 18 | DQ107540 <i>Ergasilus yaluzangbus</i> CN      | 87.96  | 88.22 | 87.73 | 85.65 | 88.95 | 88.91 | 90.24 | 89.21 | 88.91 | 89.36 | 89.37 | 88.75 | 89.51 | 89.81 | 90.28 | 89.38 | 90.52 |       | 78    | 75     | 77    | 76    | 71    | 74    | 73    | 111   | 94    | 98    | 97    | 212 |
| 19 | MW810240 <i>Neoergasilus japonicus</i> CZ     | 88.60  | 88.60 | 90.00 | 87.75 | 93.04 | 89.07 | 93.57 | 88.76 | 88.30 | 89.37 | 94.02 | 88.46 | 94.02 | 91.82 | 92.80 | 93.57 | 91.14 | 88.29 |       | 2      | 2     | 1     | 55    | 60    | 55    | 92    | 80    | 81    | 79    | 216 |
| 20 | MH167967 <i>Neoergasilus japonicus</i> CZ     | 88.32  | 88.32 | 89.92 | 87.18 | 92.79 | 88.80 | 93.43 | 88.32 | 87.84 | 88.96 | 93.90 | 88.00 | 94.22 | 91.84 | 92.85 | 93.43 | 90.69 | 88.08 | 99.76 |        | 0     | 1     | 54    | 58    | 54    | 91    | 79    | 80    | 78    | 212 |
| 21 | MW810241 <i>Neoergasilus japonicus</i> CZ     | 88.82  | 88.82 | 90.24 | 87.90 | 93.19 | 89.30 | 93.80 | 88.84 | 88.38 | 89.45 | 94.24 | 88.53 | 94.24 | 92.06 | 93.04 | 93.80 | 91.21 | 88.44 | 99.77 | 100.00 |       | 1     | 54    | 58    | 54    | 91    | 79    | 80    | 78    | 215 |
| 22 | MH167968 <i>Neoergasilus japonicus</i> CZ     | 88.16  | 88.16 | 89.76 | 87.02 | 92.63 | 88.64 | 93.27 | 88.16 | 87.68 | 88.80 | 93.74 | 87.84 | 94.06 | 91.68 | 92.68 | 93.27 | 90.53 | 87.92 | 99.92 | 99.84  | 99.84 |       | 55    | 59    | 55    | 92    | 80    | 81    | 79    | 213 |
| 23 | DQ107530 <i>Paraergasilus brevidigitus</i> CN | 89.84  | 90.03 | 92.95 | 89.58 | 93.20 | 89.91 | 93.20 | 89.76 | 89.60 | 88.69 | 91.88 | 88.99 | 92.03 | 92.39 | 93.06 | 92.47 | 93.77 | 89.80 | 91.67 | 91.33  | 91.82 | 91.17 |       | 9     | 8     | 84    | 67    | 71    | 71    | 205 |
| 24 | MW810243 <i>Paraergasilus longidigitus</i> CZ | 89.36  | 89.36 | 92.27 | 89.04 | 92.24 | 89.91 | 93.15 | 89.60 | 89.45 | 88.38 | 91.16 | 88.84 | 91.46 | 92.33 | 93.00 | 92.09 | 92.99 | 88.82 | 90.93 | 90.69  | 91.16 | 90.53 | 98.62 |       | 15    | 83    | 66    | 70    | 70    | 205 |
| 25 | DQ107529 <i>Paraergasilus medius</i> CN       | 89.69  | 89.88 | 92.32 | 89.73 | 92.04 | 89.45 | 92.91 | 88.99 | 88.99 | 88.23 | 91.30 | 88.23 | 91.45 | 92.24 | 92.43 | 91.61 | 93.91 | 89.51 | 91.67 | 91.33  | 91.82 | 91.17 | 98.83 | 97.70 |       | 83    | 64    | 70    | 72    | 207 |
| 26 | DQ107524 <i>Sinergasilus major</i> CN         | 85.50  | 85.84 | 87.17 | 96.37 | 87.43 | 86.09 | 89.16 | 86.24 | 86.24 | 85.47 | 86.83 | 85.63 | 86.83 | 86.05 | 86.93 | 86.85 | 88.42 | 84.07 | 86.08 | 85.42  | 86.23 | 85.26 | 87.84 | 87.37 | 87.99 |       | 21    | 19    | 22    | 239 |
| 27 | MZ047815 <i>Sinergasilus major</i> HU         | 87.92  | 87.92 | 89.38 | 98.62 | 89.14 | 88.84 | 91.59 | 88.38 | 88.38 | 87.61 | 88.51 | 87.77 | 88.67 | 88.91 | 89.52 | 88.53 | 90.96 | 85.74 | 87.75 | 87.34  | 87.90 | 87.18 | 89.74 | 89.89 | 90.20 | 96.77 |       | 8     | 11    | 228 |
| 28 | DQ107525 <i>Sinergasilus polycolpus</i> CN    | 87.44  | 87.72 | 88.89 | 98.26 | 89.31 | 88.07 | 91.04 | 87.92 | 87.92 | 87.16 | 88.71 | 87.31 | 88.71 | 88.22 | 89.13 | 88.73 | 90.45 | 85.94 | 87.75 | 87.18  | 87.90 | 87.02 | 89.73 | 89.35 | 89.87 | 97.24 | 98.77 |       | 9     | 227 |
| 29 | DQ107526 <i>Sinergasilus undulatus</i> CN     | 87.44  | 87.72 | 88.89 | 98.40 | 89.16 | 88.38 | 91.04 | 87.92 | 88.07 | 87.46 | 88.57 | 87.31 | 88.57 | 87.75 | 88.82 | 88.87 | 90.01 | 86.08 | 88.05 | 87.50  | 88.20 | 87.34 | 89.73 | 89.35 | 89.58 | 96.80 | 98.31 | 98.69 |       | 229 |
| 30 | MH982204 <i>Lernaea cyprinacea</i> CN         | 69.12  | 69.12 | 70.47 | 67.71 | 69.83 | 70.25 | 69.59 | 70.96 | 70.82 | 70.82 | 70.82 | 71.10 | 70.96 | 68.89 | 69.16 | 69.83 | 70.68 | 70.10 | 69.48 | 68.69  | 69.55 | 68.54 | 70.96 | 70.96 | 70.68 | 66.15 | 67.71 | 67.85 | 67.56 |     |

**Table S3.** Sites of amino acid variation in the alignment of partial COI *Ergasilus mirabilis* Oldewage & van As, 1987 sequences from the Vaal River (VR), South Africa and the Zambezi River (ZR), Zambia from this study, using invertebrate mitochondrion translation and stating what amino acids the codons translate.

|    | Sequence ID | Locality | Position in alignment | Nucleotide substitutions | Codons | Codon positions | 3-letter Amino acid | Amino acid |
|----|-------------|----------|-----------------------|--------------------------|--------|-----------------|---------------------|------------|
| 1  | OR448769    | VR       | 18                    | A                        | GGA    | 16–18           | Gly                 | Glycine    |
|    | OR448770    | ZR       |                       | G                        | GGG    |                 |                     |            |
| 2  | OR448769    | VR       | 72                    | A                        | AGA    | 70–72           | Ser                 | Serine     |
|    | OR448770    | ZR       |                       | G                        | AGG    |                 |                     |            |
| 3  | OR448769    | VR       | 183                   | A                        | ATA    | 181–183         | Met                 | Methionine |
|    | OR448770    | ZR       |                       | G                        | ATG    |                 |                     |            |
| 4  | OR448769    | VR       | 339                   | G                        | GGG    | 337–339         | Gly                 | Glycine    |
|    | OR448770    | ZR       |                       | A                        | GGA    |                 |                     |            |
| 5  | OR448769    | VR       | 354                   | A                        | GTA    | 352–354         | Val                 | Valine     |
|    | OR448770    | ZR       |                       | G                        | GTG    |                 |                     |            |
| 6  | OR448769    | VR       | 387                   | G                        | TCG    | 385–387         | Ser                 | Serine     |
|    | OR448770    | ZR       |                       | A                        | TCA    |                 |                     |            |
| 7  | OR448769    | VR       | 468                   | C                        | ACC    | 466–468         | Ser                 | Serine     |
|    | OR448770    | ZR       |                       | T                        | AGT    |                 |                     |            |
| 8  | OR448769    | VR       | 570                   | T                        | CCT    | 568–570         | Pro                 | proline    |
|    | OR448770    | ZR       |                       | G                        | CCG    |                 |                     |            |
| 9  | OR448769    | VR       | 600                   | C                        | CTC    | 598–600         | Leu                 | Leucine    |
|    | OR448770    | ZR       |                       | T                        | CTT    |                 |                     |            |
| 10 | OR448769    | VR       | 670                   | C                        | CTA    | 670–672         | Leu                 | Leucine    |
|    | OR448770    | ZR       |                       | T                        | TTA    |                 |                     |            |

**Table S4.** Genetic divergences among aligned COI mtDNA sequences expressed as percentage identities (below diagonal) and differences in the number of nucleotides (above diagonal). Represented as GenBank/BOLD/Sequence ID, Taxon and Country. Sequences from the present study in bold and grey shade. *Lernaea cyprinacea* (MH982220) was used as the outgroup. Abbreviations: AR—Argentina, CA—Canada, CN—China, KR—South Korea, NI—Nicaragua, US—United States of America, ZA—South Africa (Vaal River), ZM—Zambia (Zambezi River).

|    |                                               | 1            | 2            | 3          | 4          | 5          | 6          | 7          | 8          | 9          | 10         | 11         | 12         |
|----|-----------------------------------------------|--------------|--------------|------------|------------|------------|------------|------------|------------|------------|------------|------------|------------|
| 1  | <b>OR448769 <i>Ergasilus mirabilis</i> ZA</b> |              | <b>10</b>    | <b>132</b> | <b>139</b> | <b>122</b> | <b>122</b> | <b>139</b> | <b>114</b> | <b>133</b> | <b>134</b> | <b>149</b> | <b>150</b> |
| 2  | <b>OR448770 <i>Ergasilus mirabilis</i> ZM</b> | <b>98.55</b> |              | <b>130</b> | <b>139</b> | <b>123</b> | <b>122</b> | <b>138</b> | <b>117</b> | <b>134</b> | <b>135</b> | <b>146</b> | <b>153</b> |
| 3  | ECTCR024-14 <i>Ergasilus lizae</i> CA*        | <b>79.94</b> | <b>80.24</b> |            | 134        | 118        | 114        | 137        | 109        | 125        | 133        | 126        | 144        |
| 4  | KU557411_ <i>Ergasilus</i> sp. AR             | <b>79.32</b> | <b>79.32</b> | 79.54      |            | 128        | 124        | 154        | 112        | 126        | 133        | 137        | 142        |
| 5  | KR049035 <i>Ergasilus</i> sp. KR              | <b>79.04</b> | <b>78.87</b> | 79.73      | 78.01      |            | 14         | 115        | 108        | 107        | 102        | 117        | 138        |
| 6  | KR049036 <i>Ergasilus wilsoni</i> KR          | <b>79.04</b> | <b>79.04</b> | 80.41      | 78.69      | 97.59      |            | 114        | 107        | 105        | 99         | 118        | 138        |
| 7  | MN854870 <i>Acusicola margulisae</i> NI       | <b>79.88</b> | <b>80.03</b> | 79.18      | 77.08      | 80.24      | 80.41      |            | 103        | 118        | 133        | 138        | 149        |
| 8  | KR049037 <i>Neoergasilus japonicus</i> KR     | <b>80.41</b> | <b>79.90</b> | 81.27      | 80.76      | 81.44      | 81.62      | 82.30      |            | 40         | 112        | 115        | 131        |
| 9  | MZ964935 <i>Neoergasilus japonicus</i> US     | <b>79.79</b> | <b>79.64</b> | 81.00      | 80.76      | 81.62      | 81.96      | 82.07      | 93.13      |            | 124        | 130        | 136        |
| 10 | KR263117 <i>Sinergasilus polycolpus</i> CN    | <b>80.64</b> | <b>80.52</b> | 79.79      | 80.21      | 82.47      | 82.99      | 80.75      | 80.76      | 81.16      |            | 107        | 139        |
| 11 | MW080644 <i>Sinergasilus undulatus</i> CN     | <b>78.47</b> | <b>78.93</b> | 80.85      | 79.61      | 79.90      | 79.73      | 80.03      | 80.24      | 80.24      | 84.6       |            | 144        |
| 12 | MH982220 <i>Lernaea cyprinacea</i> CN         | <b>73.12</b> | <b>72.63</b> | 73.38      | 73.61      | 72.51      | 72.51      | 73.25      | 73.90      | 74.86      | 75.10      | 74.20      |            |

\* Taxon from the Barcode of Life Database (BOLD).
